# Supplementary material for: Development of a large animal model of lethal polytrauma and intra-abdominal sepsis with bacteremia
Source: HighWire-hosted journal article supplement (doi:10.1136/tsaco-2020-000636), 2021-01-01
Supplement: tsaco-2020-000636supp001_data_supplement.pdf [file tsaco-2020-000636supp001_data_supplement.pdf]

1

Supplemental Table 1

|                       |          | Baseline    | Shock       | Resus       | pRBC +<br>Source<br>Control |
|-----------------------|----------|-------------|-------------|-------------|-----------------------------|
| <b>pH</b>             | Survival | 7.44 (0.02) | 7.49 (0.03) | 7.28 (0.07) | 7.37 (0.07)                 |
|                       | UCI      | 7.50 (0.05) | 7.46 (0.08) | 7.36 (0.01) | 7.40                        |
|                       | CCI      | 7.42 (0.05) | 7.47 (0.13) | 7.36 (0.14) | 7.44                        |
|                       | SI       | 7.46 (0.05) | 7.48 (0.04) | 7.41 (0.09) | 7.23 (0.05)                 |
| <b>Hgb<br/>(g/dL)</b> | Survival | 9.4 (1.3)   | 10.6 (1.0)  | 10.0 (1.6)  | 7.0 (1.0)                   |
|                       | UCI      | 9.5 (1.6)   | 9.1 (0.4)   | 7.9 (0.6)   | 5.9                         |
|                       | CCI      | 11.0 (0.8)  | 10.3 (0.7)  | 9.3 (0.5)   | 7.1                         |
|                       | SI       | 9.6 (0.6)   | 10.5 (2.3)  | 10.2 (1.7)  | 8.1 (0.4)                   |
| <b>K<br/>(mM)</b>     | Survival | 3.8 (0.2)   | 4.5 (0.2)   | 5.1 (0.5)   | 4.6 (0.9)                   |
|                       | UCI      | 4.0 (0.1)   | 4.0 (0.1)   | 4.9 (0.8)   | 4.9                         |
|                       | CCI      | 3.7 (0.2)   | 3.9 (0.3)   | 5.1 (1.3)   | 5.8                         |
|                       | SI       | 4.0 (0.4)   | 4.5 (0.5)   | 5.0 (0.4)   | 4.1 (0.1)                   |
| <b>Na<br/>(mM)</b>    | Survival | 137 (0.5)   | 135 (0.8)   | 136 (3.6)   | 139 (2.2)                   |
|                       | UCI      | 140 (2.5)   | 140 (1.7)   | 138 (0.7)   | 144                         |
|                       | CCI      | 136 (3.6)   | 135 (4.6)   | 143 (4.5)   | 141                         |
|                       | SI       | 140 (1.8)   | 139 (2.6)   | 145 (2.6)   | 144 (2.1)                   |
| <b>Ca</b>             | Survival | 1.32 (0.05) | 1.27 (0.04) | 1.29 (0.11) | 1.32 (0.08)                 |

2

|                             |          |             |             |             |             |
|-----------------------------|----------|-------------|-------------|-------------|-------------|
| <b>(mM)</b>                 | UCI      | 1.34 (0.04) | 1.27 (0.07) | 1.29 (0.11) | 1.34        |
|                             | CCI      | 1.35 (0.06) | 1.31 (0.06) | 1.29 (0.11) | 1.34        |
|                             | SI       | 1.34 (0.05) | 1.31 (0.05) | 1.26 (0.07) | 1.24 (0.10) |
| <b>Cl<br/>(mM)</b>          | Survival | 102 (2.6)   | 102 (2.8)   | 103 (3.7)   | 111 (2.6)   |
|                             | UCI      | 104 (3.8)   | 110 (5.5)   | 107 (2.1)   | 114         |
|                             | CCI      | 104 (4.4)   | 103 (5.5)   | 105 (2.9)   | 113         |
|                             | SI       | 104 (2.1)   | 105 (2.2)   | 105 (2.9)   | 112 (2.1)   |
| <b>Glucose<br/>(mg/dL)</b>  | Survival | 95 (7)      | 167 (44)    | 136 (65)    | 110 (31)    |
|                             | UCI      | 83 (19)     | 140 (42)    | 140 (30)    | 89          |
|                             | CCI      | 100 (12)    | 156 (36)    | 179 (88)    | 103         |
|                             | SI       | 87 (14)     | 197 (60)    | 170 (88)    | 157 (26)    |
| <b>Lactate<br/>(mmol/L)</b> | Survival | 1.5 (0.6)   | 3.1 (1.5)   | 9.2 (6.3)   | 4.9 (3.8)   |
|                             | UCI      | 1.3 (0.5)   | 4.5 (2.0)   | 11.7 (3.0)  | 5.0         |
|                             | CCI      | 1.1 (0.4)   | 2.6 (1.5)   | 9.1 (4.7)   | 6.1         |
|                             | SI       | 1.6 (0.6)   | 3.5 (1.6)   | 8.1 (3.0)   | 8.5 (3.8)   |
| <b>HCO<sub>3</sub></b>      | Survival | 28.3 (1.9)  | 27.5 (2.1)  | 18.3 (7.2)  | 21.0 (4.1)  |
|                             | UCI      | 30.2 (2.1)  | 22.8 (4.4)  | 17.0 (2.6)  | 17.5        |
|                             | CCI      | 28.9 (0.8)  | 28.0 (2.4)  | 21.7 (5.8)  | 20.3        |
|                             | SI       | 28.0 (1.1)  | 28.7 (4.2)  | 21.6 (4.0)  | 15.2 (3.2)  |

Select arterial blood gas data: Data presented as group means with standard deviation shown in parentheses. Hgb = hemoglobin; K = potassium; Na = sodium; Ca = calcium; Cl = chloride;

3

HCO<sub>3</sub> = bicarbonate; Shock = end of hemorrhage/start of shock; Resus = end of shock/start of normal saline resuscitation; pRBC + Source Control = start of blood transfusion, colon injury closure, abdominal washout and antibiotic administration; Survival = survival group; UCI = uncontrolled cecal injury group; CCI = controlled cecal injury group; SI = sigmoid injury group.

### Supplemental Table 2

|                |                                                                                                                                                                                                                            |
|----------------|----------------------------------------------------------------------------------------------------------------------------------------------------------------------------------------------------------------------------|
| Cecal Injury   | <i>Pseudomonas</i> (2)<br><i>Streptococcus</i><br><i>Sphingomonas</i><br><i>Prevotella</i><br><i>E. coli</i> (2)<br><i>Enterococcus</i> (2)<br><i>Chryseobacterium</i> (2)<br><i>Stenotrophomonas</i><br><i>Klebsiella</i> |
| Sigmoid Injury | <i>Pseudomonas</i> (3)<br><i>Klebsiella</i> (2)<br><i>B hemolytic Streptococcus</i> (1)<br><i>Sphinomonas</i> (1)<br><i>Streptococcus pluranimalium</i> (1)<br><i>Enterococcus</i> (1)<br><i>E. coli</i> (1)               |

4

|  |                                                             |
|--|-------------------------------------------------------------|
|  | <i>Chryseobacterium</i> (1)<br><i>Stenotrophomonas</i> (1)_ |
|--|-------------------------------------------------------------|

Blood culture results: Peripheral blood cultures drawn immediately before antibiotics and source control, if the animal survived to that point. If the animal died prior, blood cultures were drawn at time of death. Results displayed as bacterium grown on aerobic or anaerobic blood culture.
